# Supplementary material
Source: Springer Nature journal article supplement (https://www.springermedizin.de/resource/supplementary/12955_2008_547_MOESM3_ESM.pdf/9560678)
Supplement: MOESM3 [file 9560678]

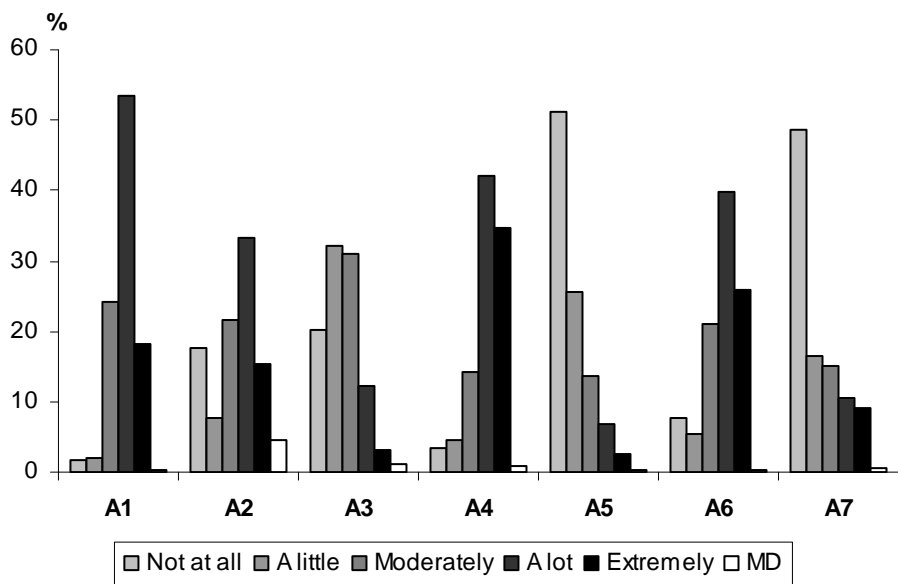

Content of PACT-Q1 items :

**A1** – Confidence in prevention of blood clots

**A2** – Expectations of symptom relief

**A3** – Expectations of side effects

**A4** – Importance of ease of use

**A5** – Worries about making mistakes

**A6** – Importance of independency

**A7** – Worries about cost

MD, missing data
